# Supplementary material
Source: publisher site journal article supplement (https://www.dovepress.com/get_supplementary_file.php?f=424422.docx)

**Supplementary Table 1**. Protein Sites with Over 1.5-fold Change in Crontonylation Levels Following Hypoxic Treatment

| **Gene name** | **Position** | **Regulated Type** | **Ratio** |  | **Gene name** | **Position** | **Regulated Type** | **Ratio** |
| --- | --- | --- | --- | --- | --- | --- | --- | --- |
| ABCB9 | 355 | Down | 0.558 |  | AARS | 19 | Up | 1.907 |
| ALCAM | 152 | Down | 0.658 |  | AHNAK | 5103 | Up | 1.516 |
| ATP1A1 | 36 | Down | 0.586 |  | ALDOA | 330 | Up | 1.768 |
| ATP1A1 | 773 | Down | 0.457 |  | ANXA1 | 161 | Up | 1.512 |
| ATP1B1 | 13 | Down | 0.551 |  | ANXA1 | 245 | Up | 1.598 |
| ATP1B1 | 113 | Down | 0.464 |  | ANXA5 | 309 | Up | 2.069 |
| ATP1B3 | 259 | Down | 0.621 |  | CBR1 | 180 | Up | 1.507 |
| DDX21 | 131 | Down | 0.509 |  | CFL1 | 121 | Up | 1.504 |
| DDX21 | 137 | Down | 0.562 |  | EEF1A1P5 | 386 | Up | 1.626 |
| DDX21 | 285 | Down | 0.504 |  | EEF1A1P5 | 450 | Up | 1.501 |
| DDX21 | 595 | Down | 0.514 |  | EIF4A1 | 174 | Up | 1.508 |
| DDX5 | 33 | Down | 0.663 |  | EIF4H | 76 | Up | 1.799 |
| EPCAM | 229 | Down | 0.663 |  | ENO1 | 228 | Up | 1.85 |
| ERP29 | 237 | Down | 0.62 |  | FSCN1 | 41 | Up | 1.544 |
| FTSJ3 | 214 | Down | 0.61 |  | GART | 404 | Up | 1.692 |
| HIST1H1A | 66 | Down | 0.456 |  | HMGB1 | 43 | Up | 1.533 |
| HIST1H1A | 93 | Down | 0.583 |  | HMGB1 | 59 | Up | 1.616 |
| HIST1H1B | 55 | Down | 0.483 |  | HMGB1 | 88 | Up | 1.598 |
| HIST1H1B | 66 | Down | 0.429 |  | HMGB1 | 172 | Up | 1.758 |
| HIST1H1C | 46 | Down | 0.365 |  | HSP90AB1 | 265 | Up | 9.012 |
| HIST1H1C | 52 | Down | 0.483 |  | IFIT1 | 392 | Up | 1.509 |
| HIST1H1C | 63 | Down | 0.559 |  | MBIP | 139 | Up | 1.511 |
| HIST1H1C | 85 | Down | 0.632 |  | MTHFD1 | 739 | Up | 1.832 |
| HIST1H1C | 90 | Down | 0.583 |  | MYH9 | 403 | Up | 1.661 |
| HIST1H1C | 106 | Down | 0.515 |  | MYH9 | 966 | Up | 1.593 |
| HIST1H2AC | 96 | Down | 0.622 |  | MYH9 | 972 | Up | 1.559 |
| HIST1H2AD | 37 | Down | 0.614 |  | MYH9 | 1330 | Up | 1.581 |
| HIST1H2AH | 37 | Down | 0.587 |  | MYH9 | 1338 | Up | 1.58 |
| HIST1H2AH | 96 | Down | 0.62 |  | MYH9 | 1445 | Up | 1.584 |
| HIST1H4A | 78 | Down | 0.511 |  | MYH9 | 1518 | Up | 1.632 |
| ITGA3 | 1031 | Down | 0.623 |  | MYH9 | 1806 | Up | 1.559 |
| KTN1 | 872 | Down | 0.656 |  | MYH9 | 1862 | Up | 1.653 |
| LRPAP1 | 180 | Down | 0.649 |  | MYL6 | 81 | Up | 1.565 |
| LRPPRC | 1350 | Down | 0.65 |  | NAMPT | 330 | Up | 2.098 |
| NDUFA4 | 10 | Down | 0.623 |  | P4HA1 | 229 | Up | 1.771 |
| NOLC1 | 571 | Down | 0.635 |  | PFKL | 726 | Up | 1.59 |
| NOLC1 | 601 | Down | 0.639 |  | PFKP | 736 | Up | 1.553 |
| PRKCSH | 180 | Down | 0.657 |  | PGK1 | 11 | Up | 1.801 |
| RPL17 | 27 | Down | 0.508 |  | PGK1 | 139 | Up | 1.7 |
| RPL19 | 195 | Down | 0.641 |  | PGK1 | 146 | Up | 1.617 |
| RPL4 | 368 | Down | 0.495 |  | PGK1 | 191 | Up | 1.726 |
| RPL6 | 260 | Down | 0.626 |  | PGK1 | 192 | Up | 2.036 |
| RPL7A | 107 | Down | 0.579 |  | PLOD2 | 335 | Up | 2.313 |
| RPS9 | 22 | Down | 0.612 |  | PPIA | 131 | Up | 1.517 |
| RRBP1 | 270 | Down | 0.642 |  | PRDX6 | 141 | Up | 1.536 |
| RRS1 | 265 | Down | 0.598 |  | PSAT1 | 116 | Up | 1.744 |
| RSL1D1 | 140 | Down | 0.599 |  | RANBP1 | 68 | Up | 1.581 |
| RSL1D1 | 145 | Down | 0.579 |  | RPL5 | 255 | Up | 1.519 |
| RSL1D1 | 254 | Down | 0.628 |  | S100A2 | 27 | Up | 1.686 |
|  |  |  |  |  | S100A2 | 29 | Up | 1.987 |
|  |  |  |  |  | S100A2 | 36 | Up | 1.694 |
|  |  |  |  |  | S100A2 | 41 | Up | 1.698 |
|  |  |  |  |  | S100A2 | 57 | Up | 1.896 |
|  |  |  |  |  | S100A6 | 31 | Up | 1.514 |
|  |  |  |  |  | SET | 177 | Up | 1.598 |
|  |  |  |  |  | SSB | 191 | Up | 1.545 |
|  |  |  |  |  | STAT1 | 379 | Up | 1.567 |
|  |  |  |  |  | TKT | 538 | Up | 1.55 |
|  |  |  |  |  | TPI1 | 43 | Up | 1.732 |
|  |  |  |  |  | TUBA1C | 163 | Up | 1.543 |
|  |  |  |  |  | UPP1 | 184 | Up | 2.053 |
|  |  |  |  |  | YWHAG | 77 | Up | 1.62 |


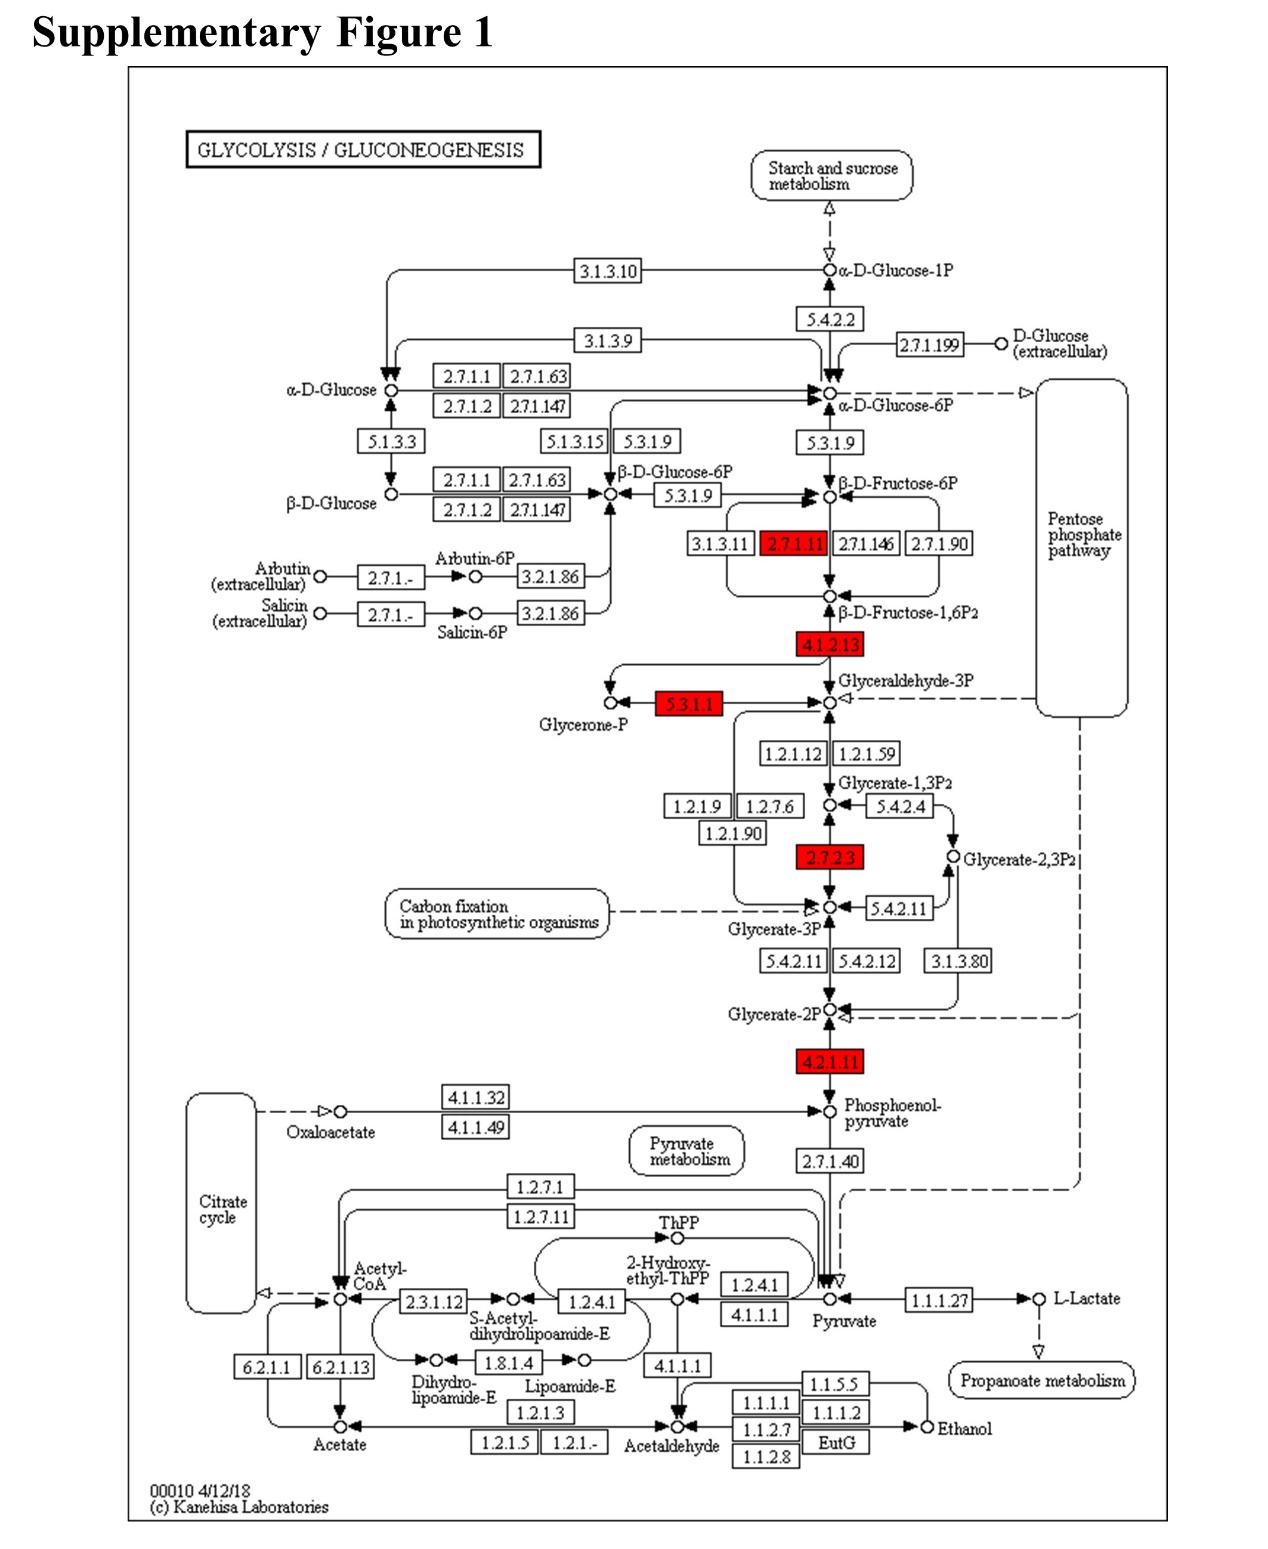


**Supplementary Figure 1** The differential crotonylated proteins in glycolysis signaling pathway in OSCC cells after 24 hours of normoxia or hypoxia culture. **Notes:** 2.7.1.11, PFK, phosphofructokinase; 4.1.2.13, ALDOA, Fructose-bisphosphate aldolase A; 5.3.1.1, TPI1, Triosephosphate isomerase; 2.7.2.3, PGK, Phosphoglycerate kinase; 4.2.1.11, ENO1, Alpha-enolase.


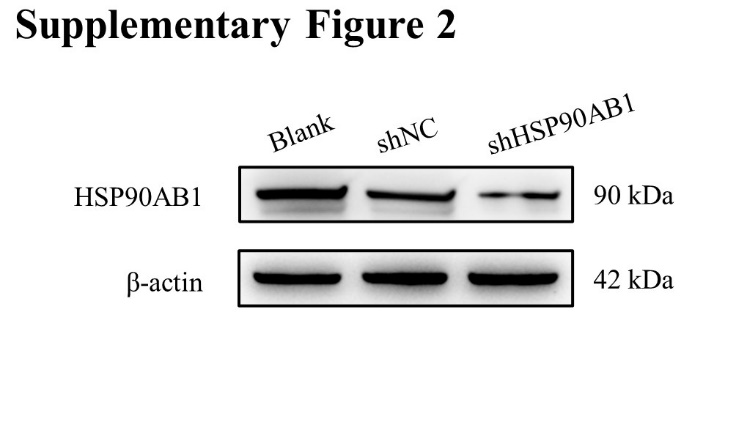


**Supplementary Figure 2** Verification of HSP90AB1 knockdown efficiency in CAL27 cells through Western blot assay.

**Supplementary File 1.** Short Tandem Repeat(STR) analysis of OSCC cell line CAL27.


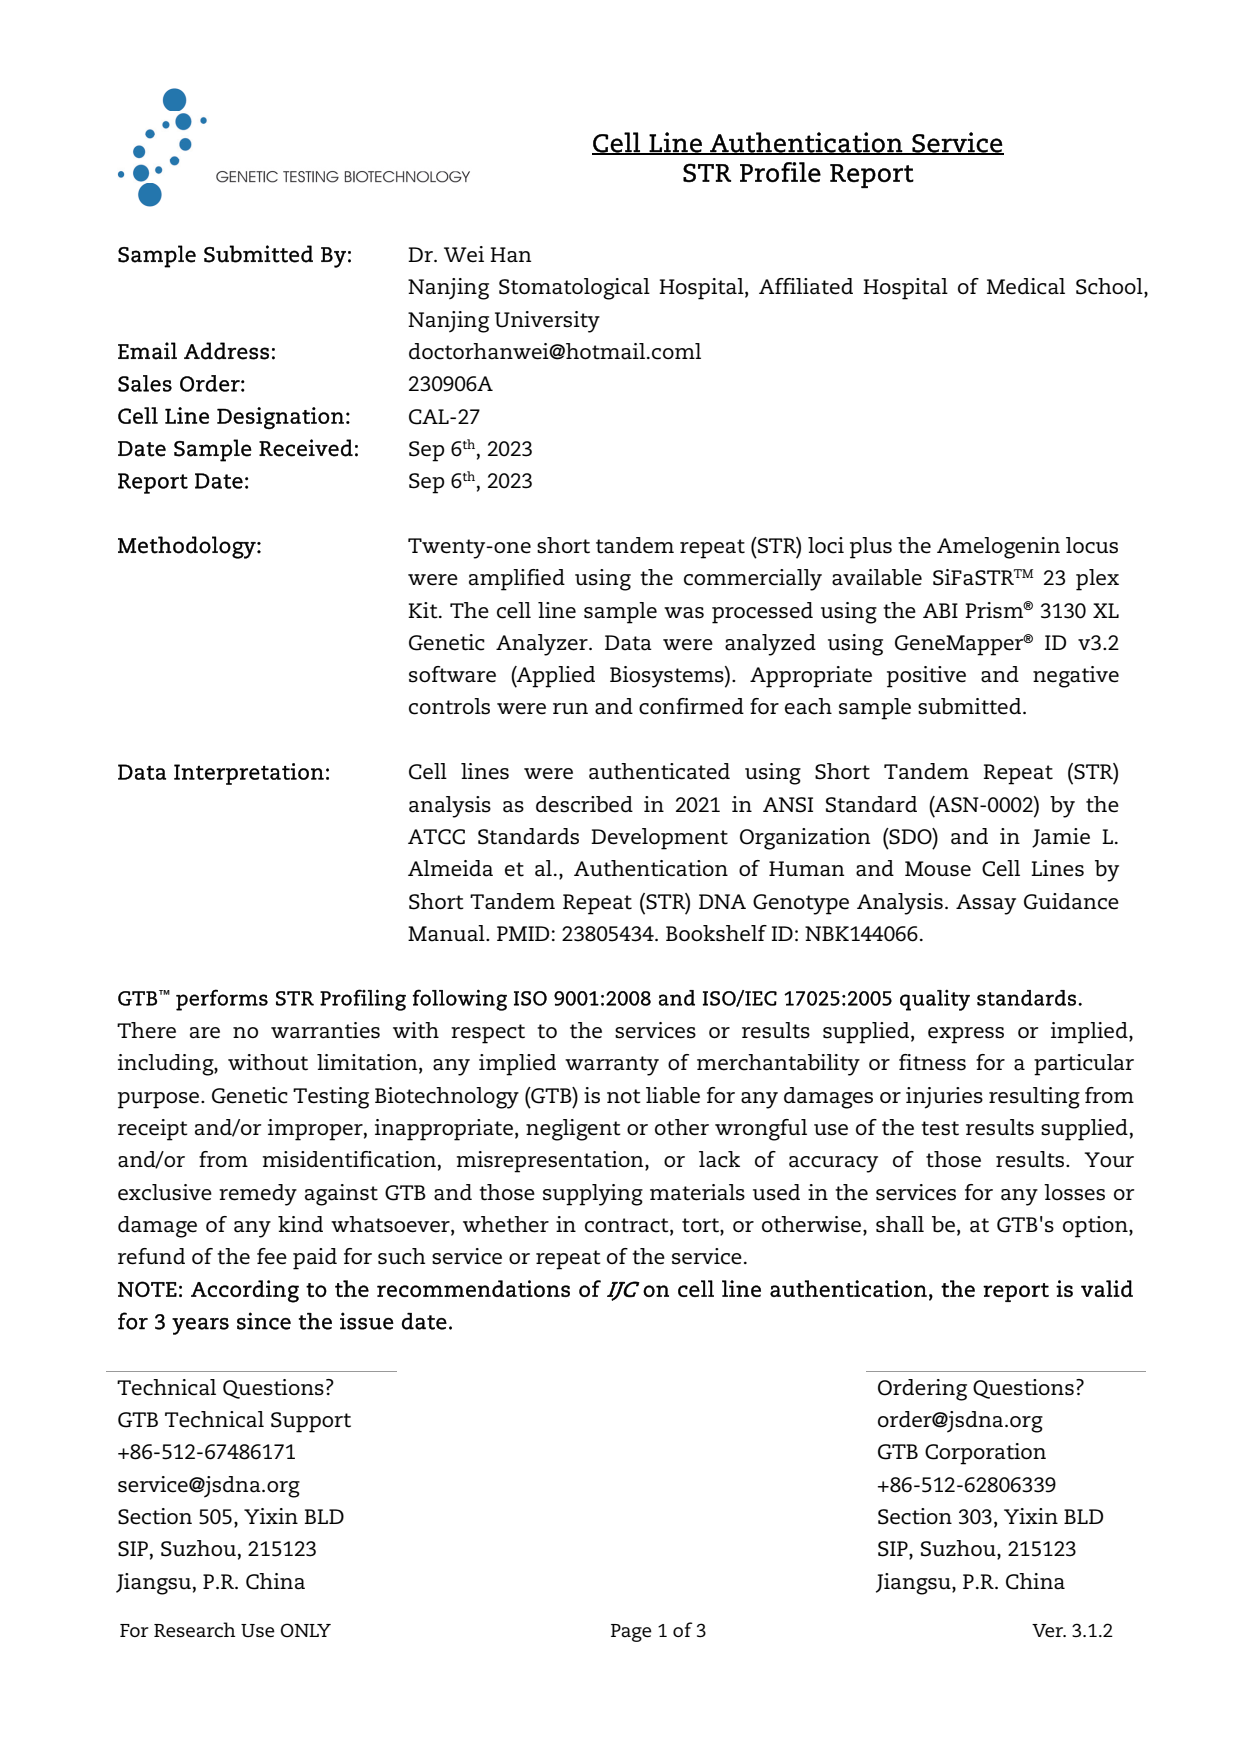


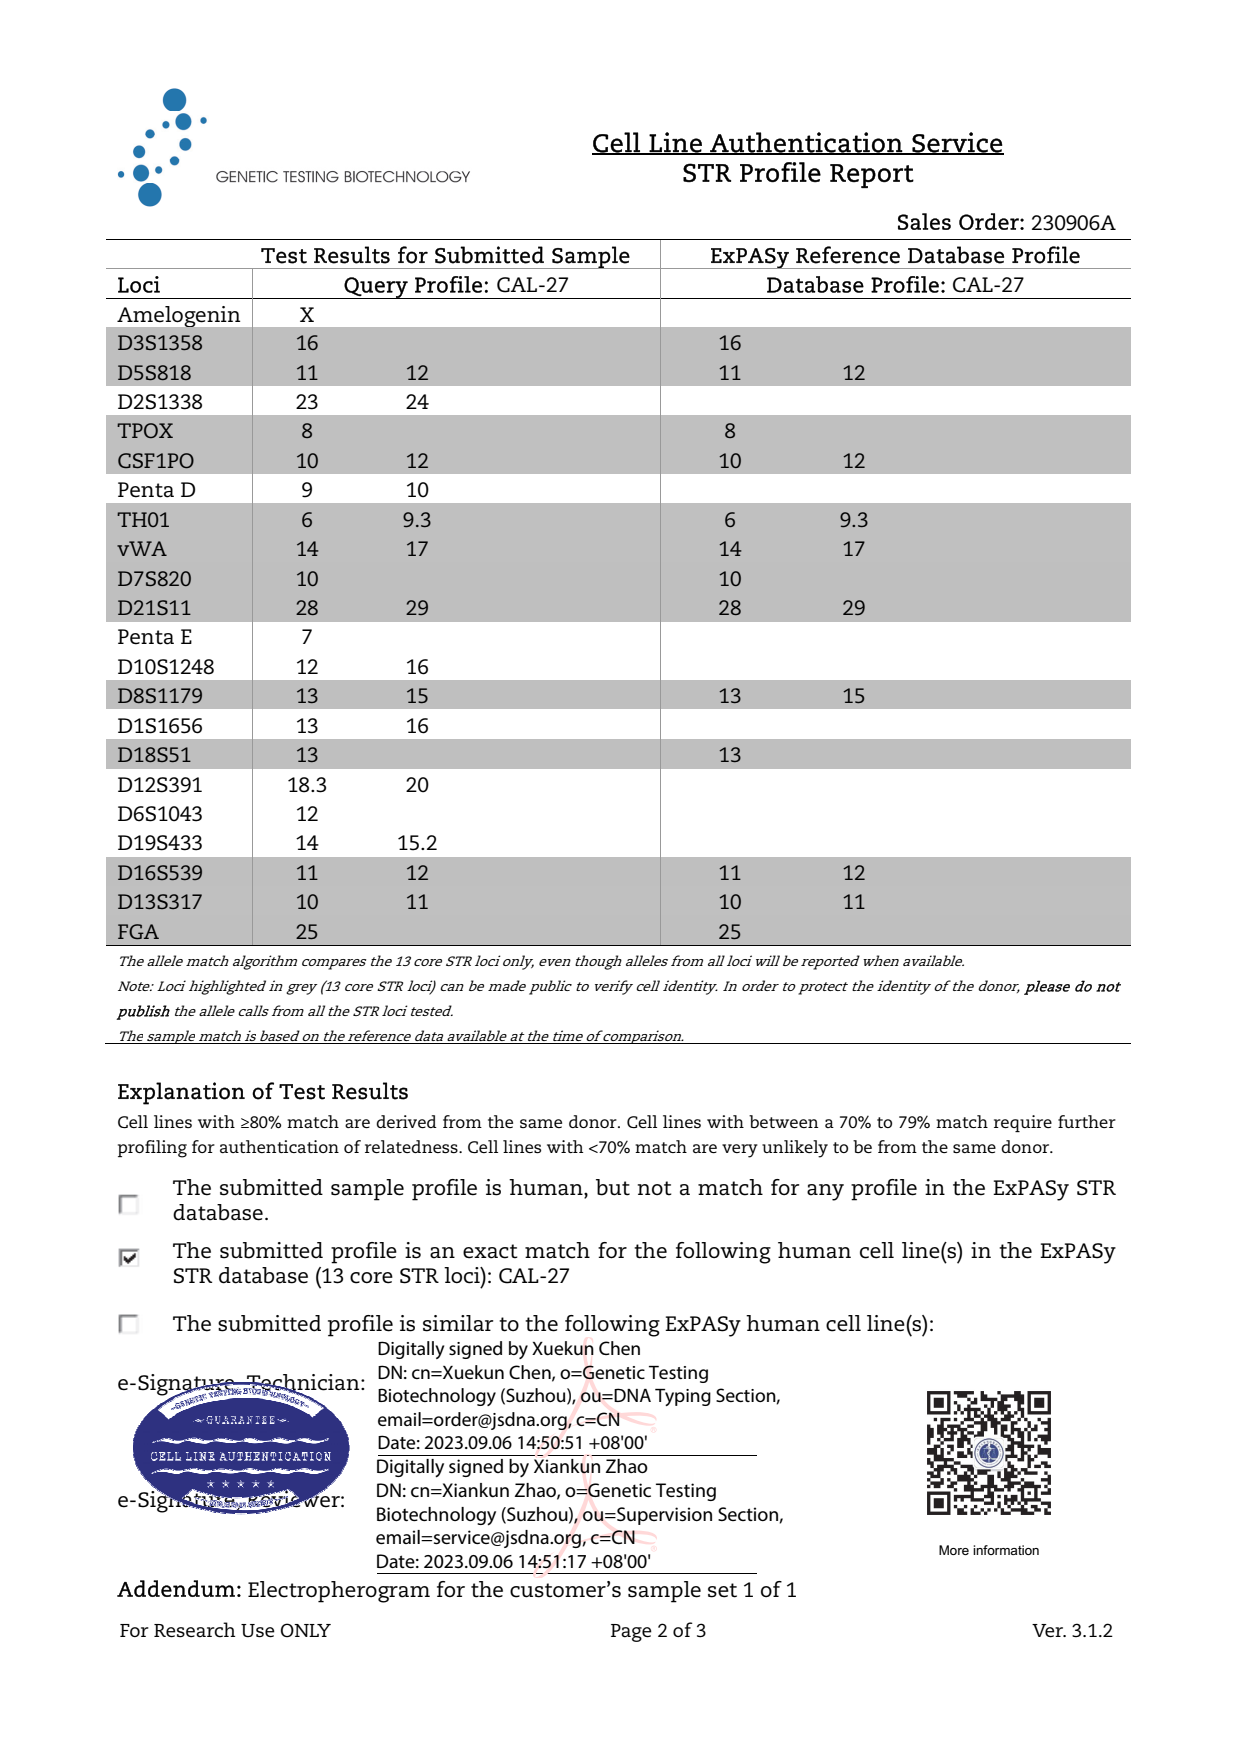


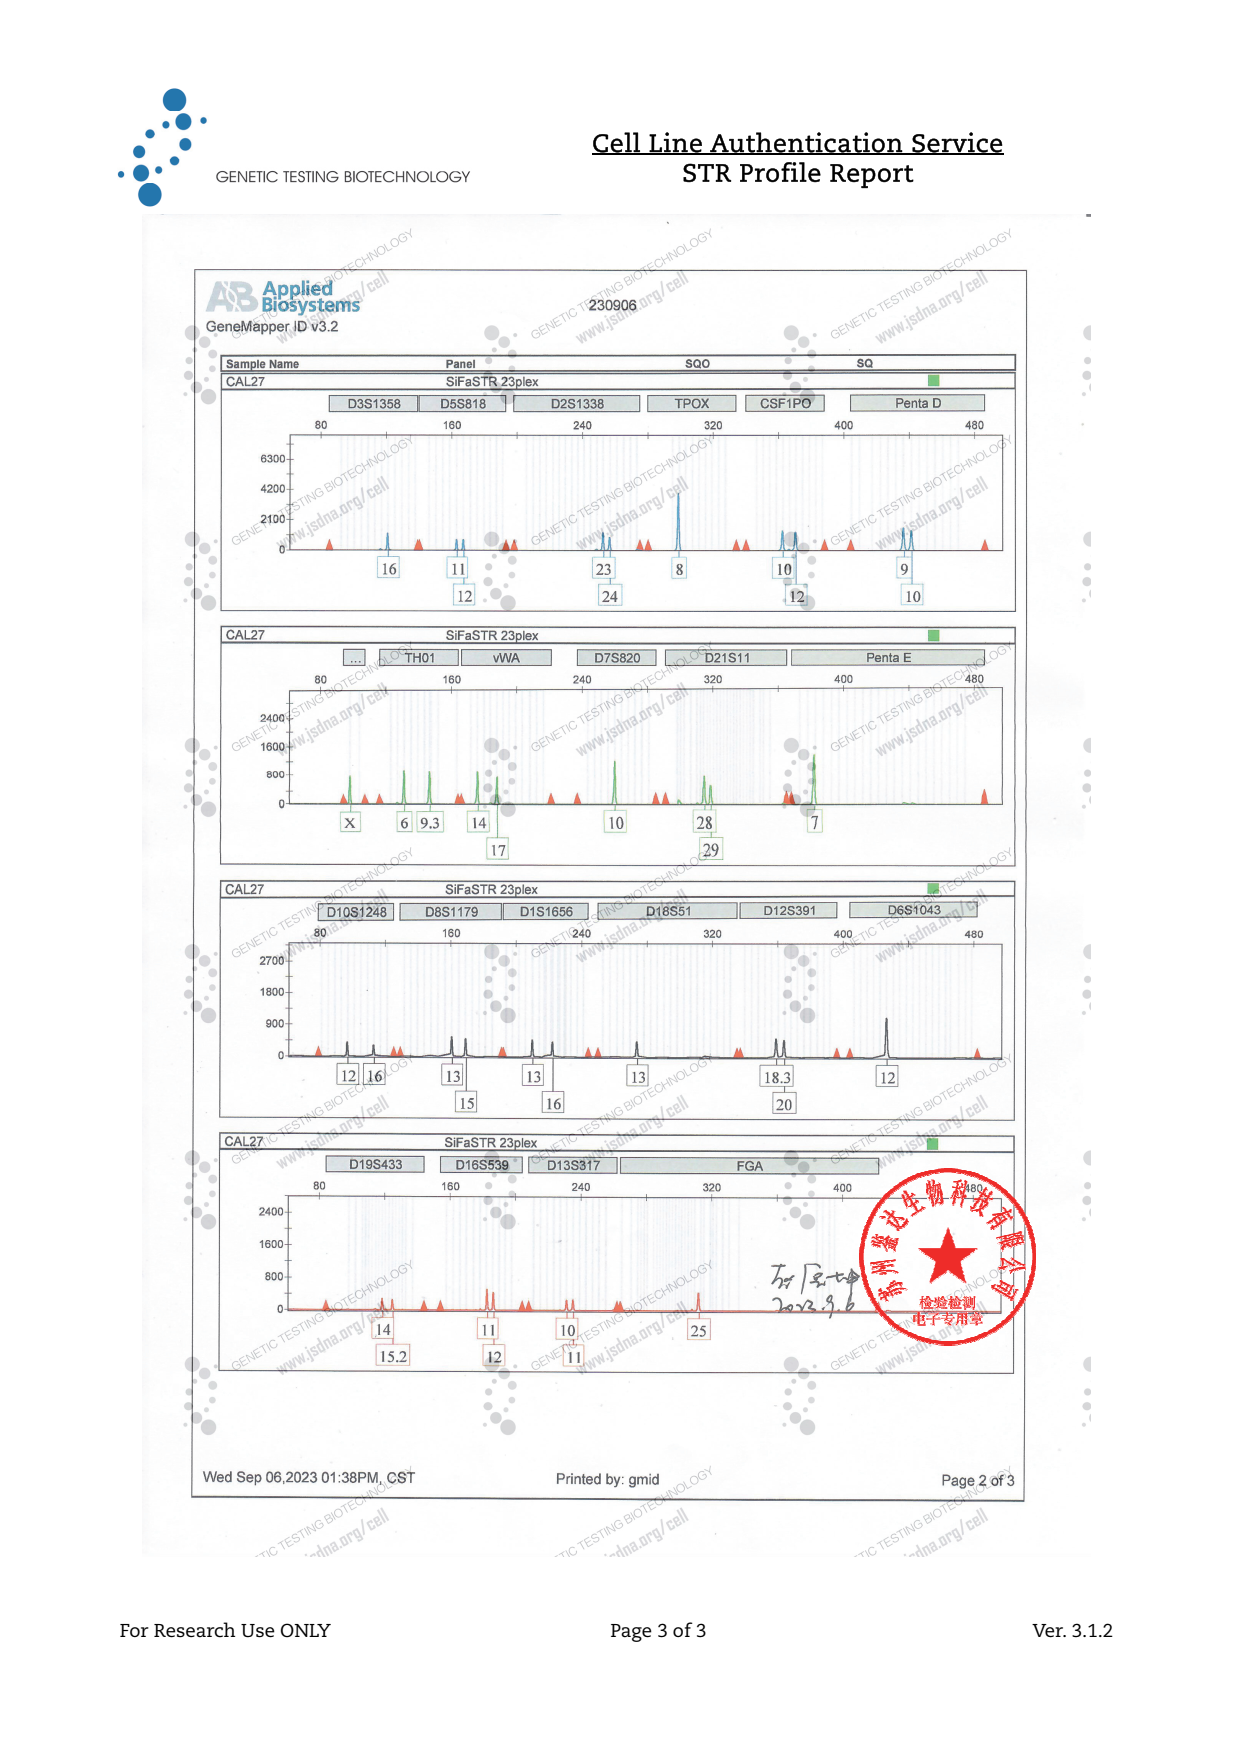


**Supplementary File 2.** All western-blot original images (non-cut) with molecular weight markers


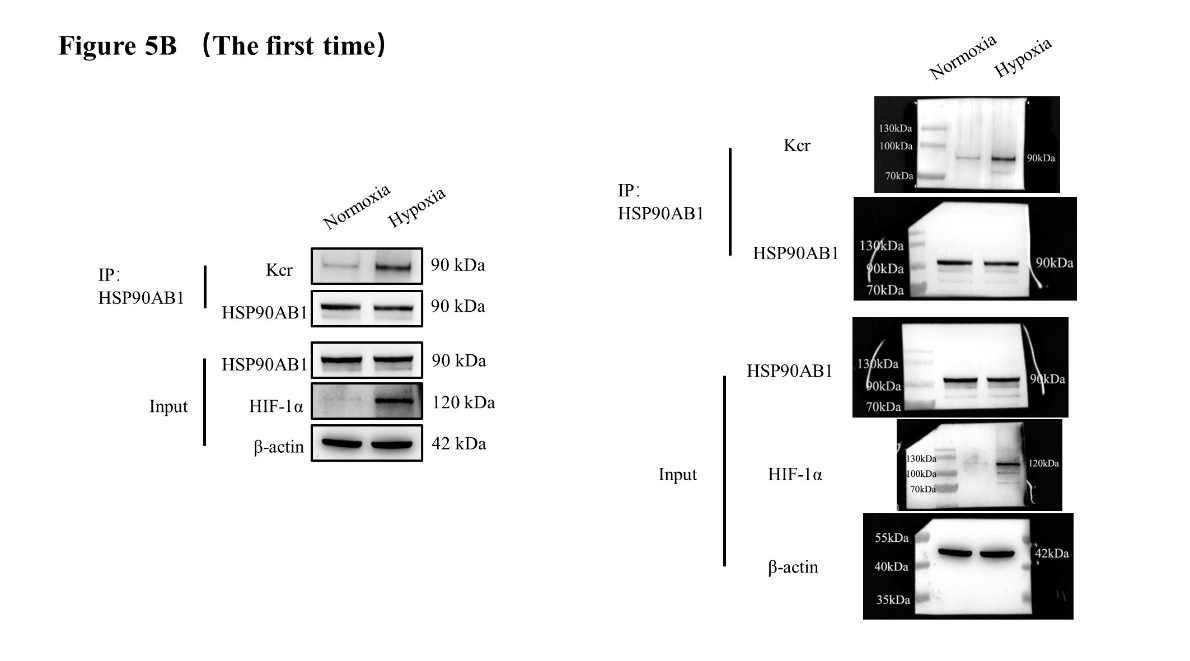


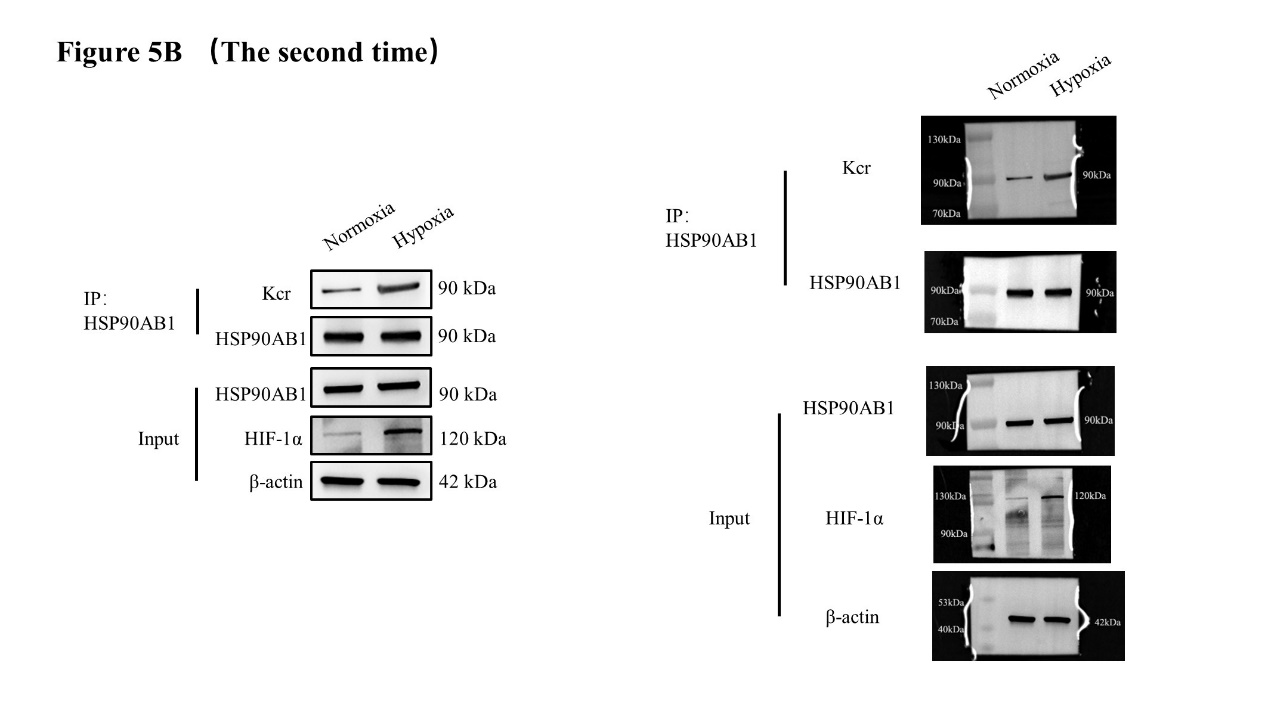


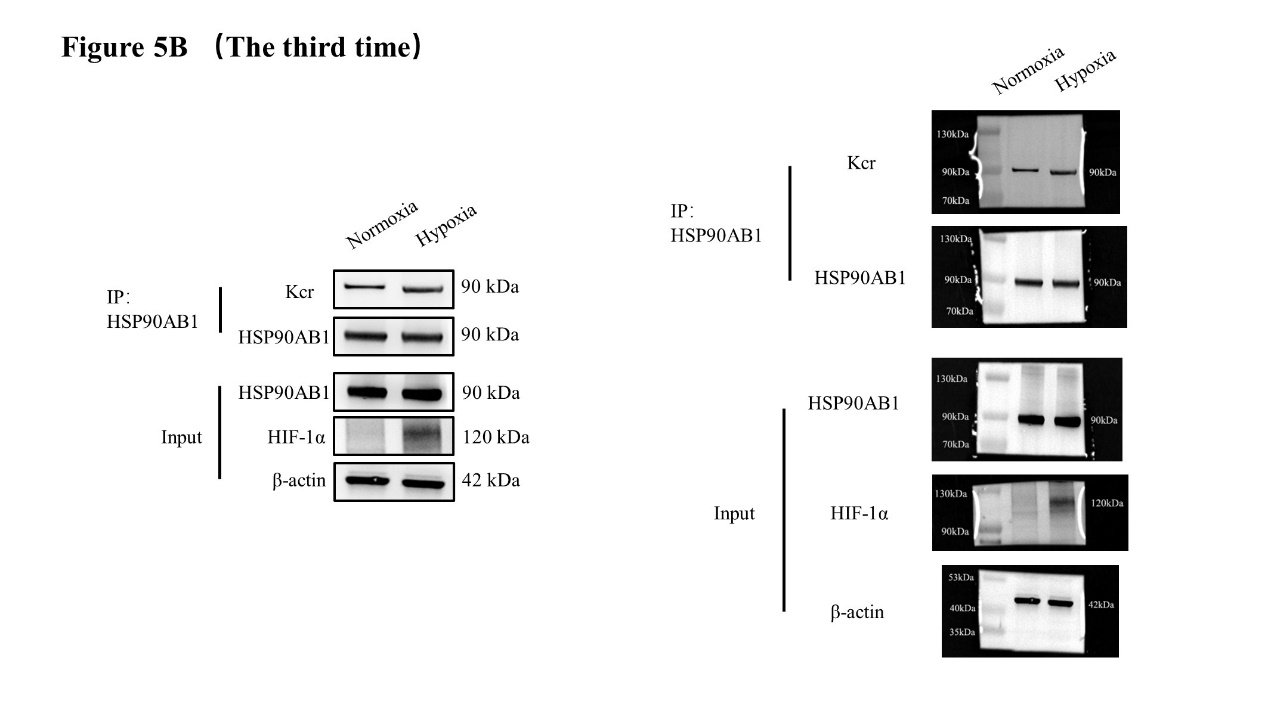


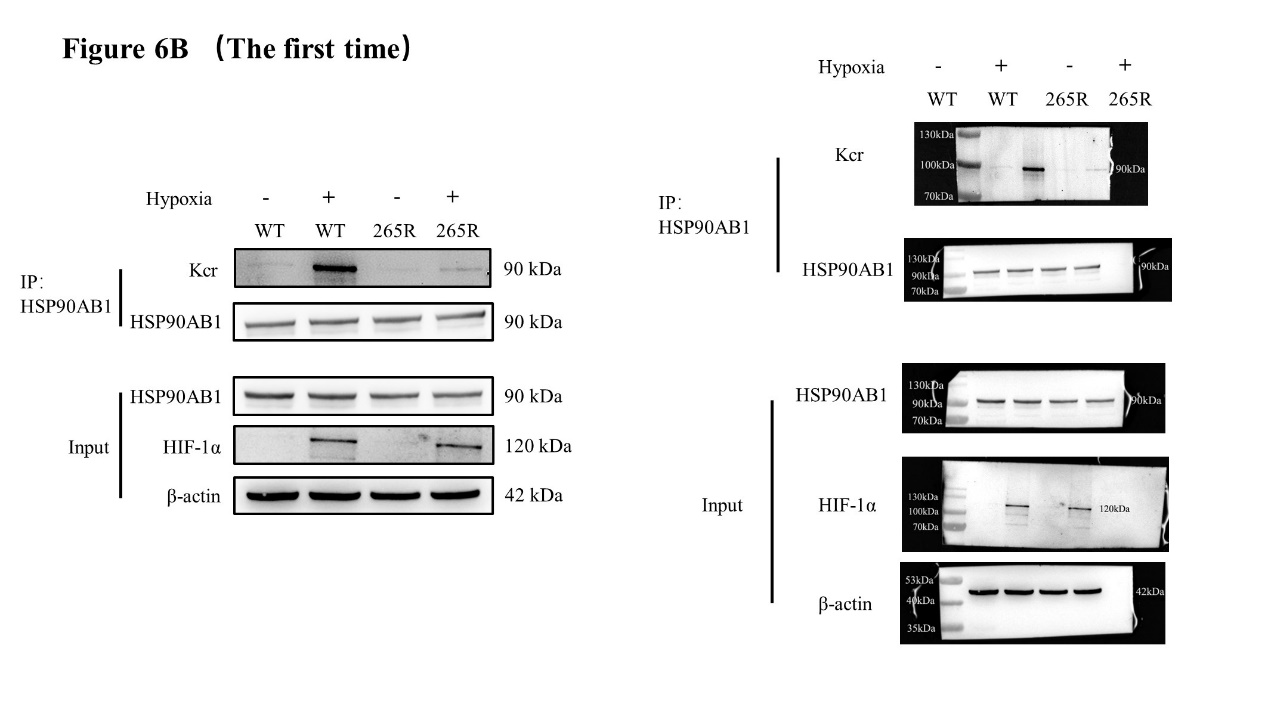


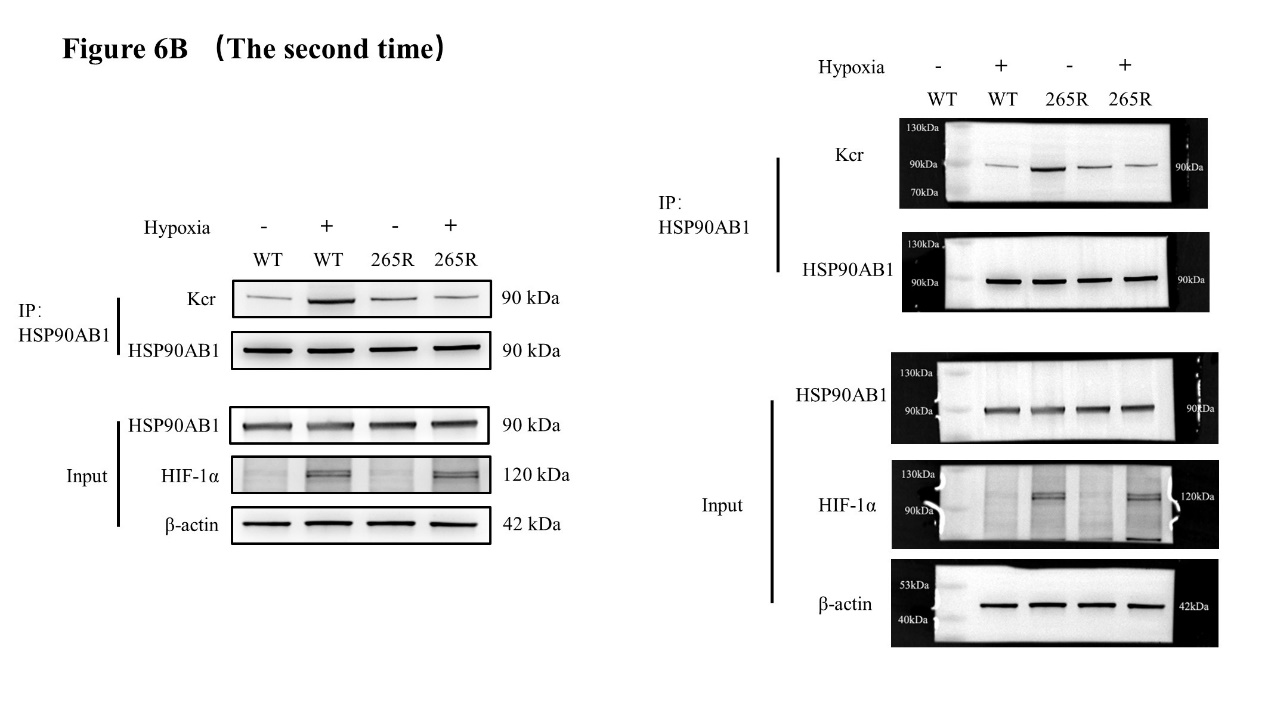


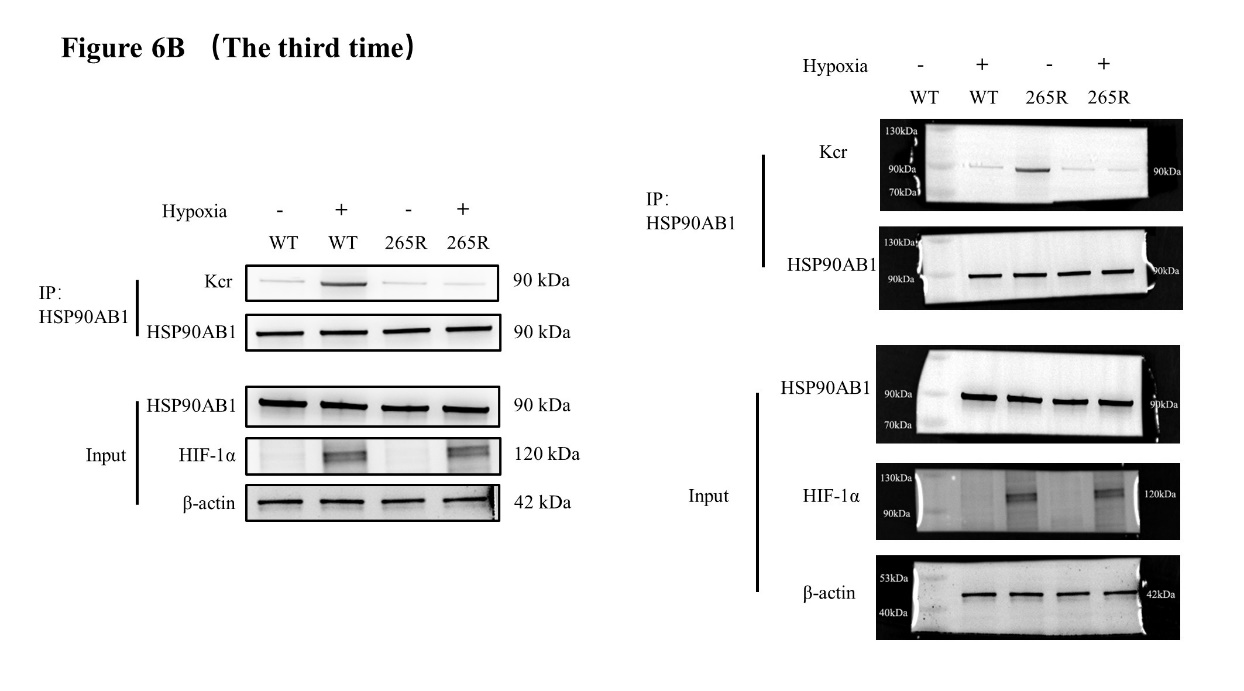


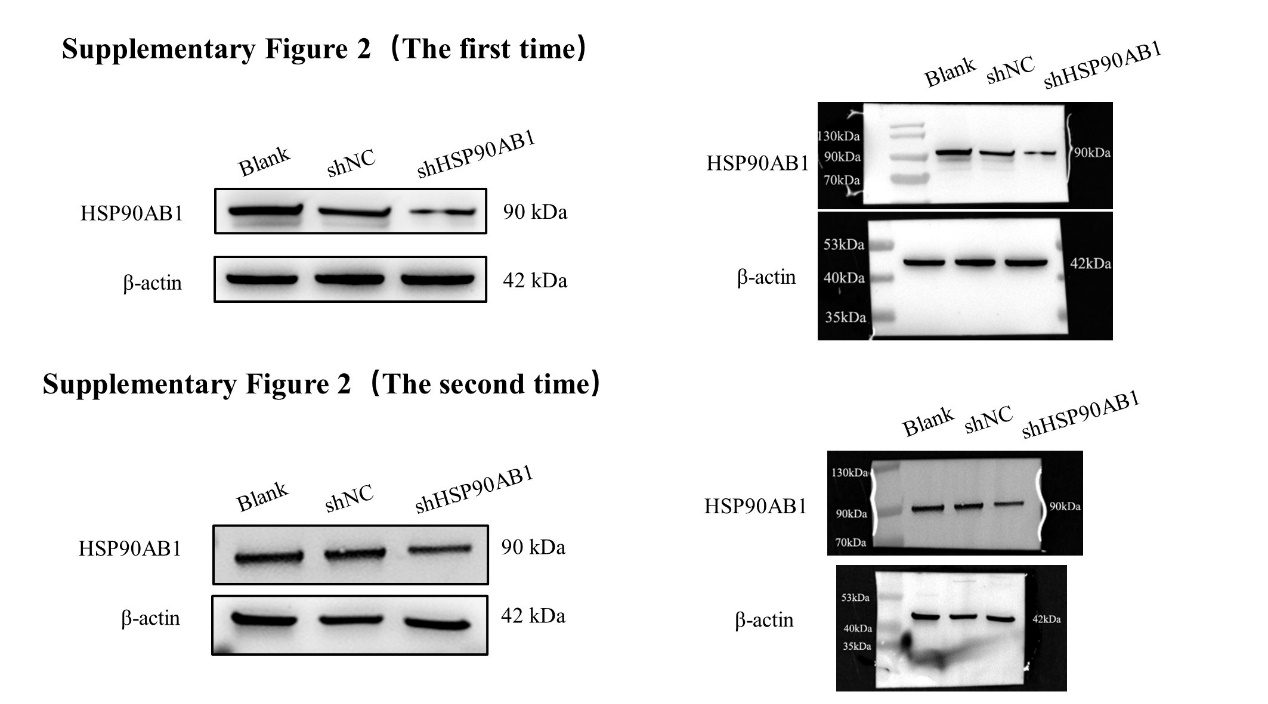


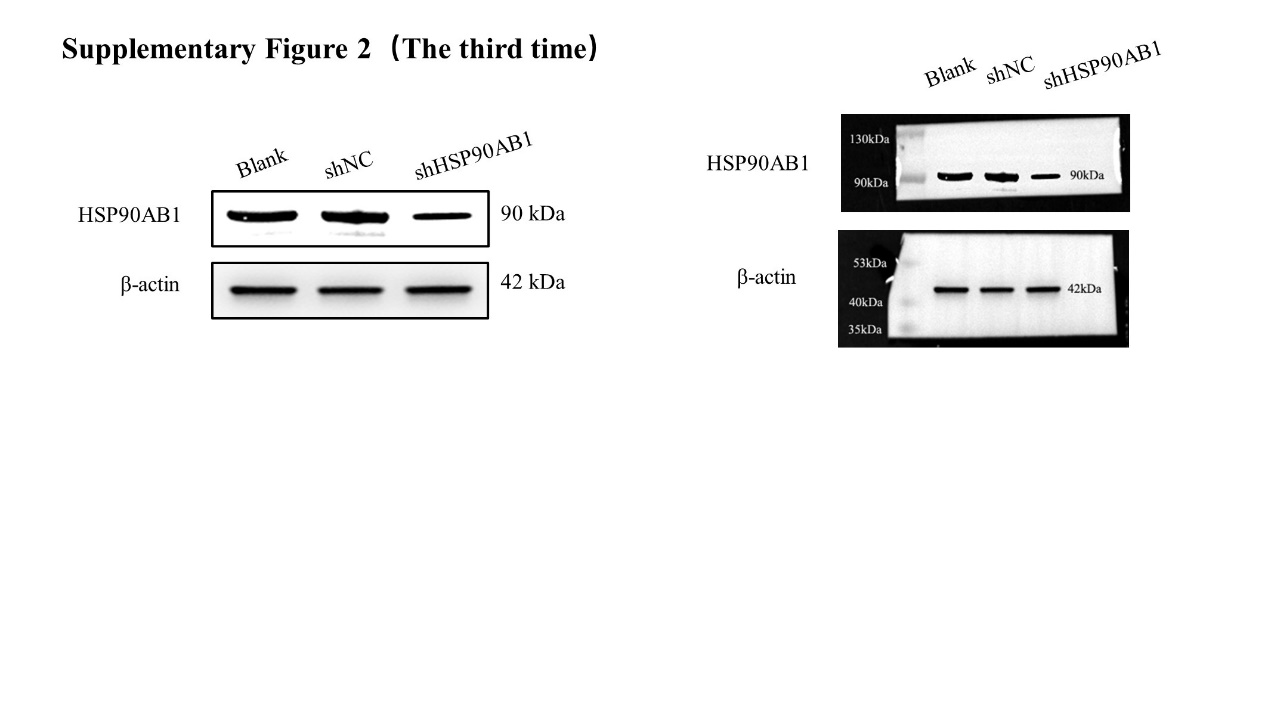

Supplement: Supplementary file 1 [file get_supplementary_file.php]
